# Supplementary material
Source: publisher figshare collection journal article supplement (https://frontiersin.figshare.com/ndownloader/files/26577607)

## Supplementary Figure 1

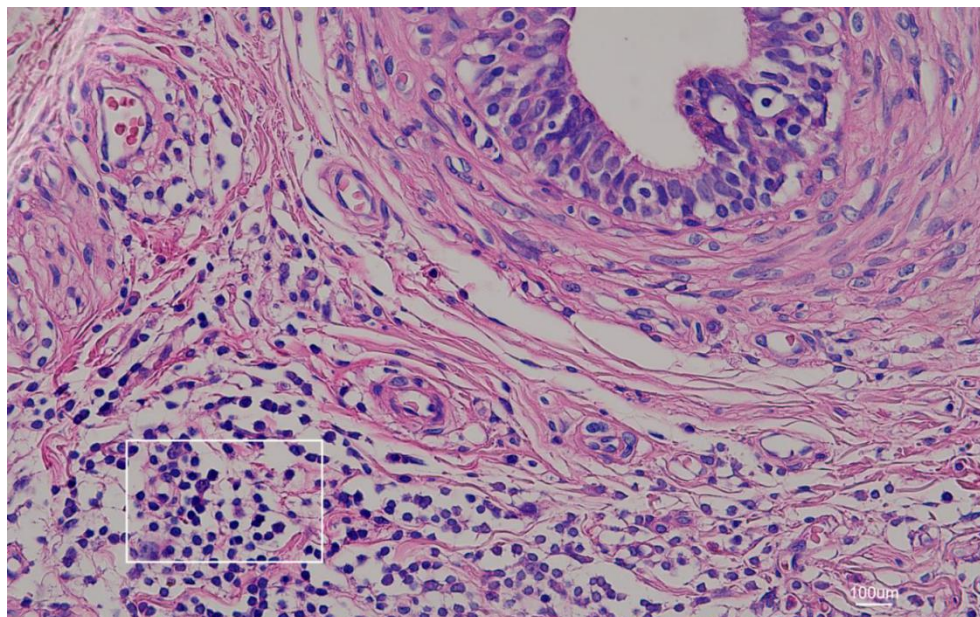

Supplement: Supplementary file [file 26577607]
